# Supplementary material for: A Global Terrestrial Precipitable Water Vapor Dataset from 2012 to 2020 Based on Microwave Radiation Imager Measurements from Three Fengyun Satellites
Source: Copernicus journal article supplement (doi:10.5194/essd-2024-395), 2024-10-08
Supplement: Supplementary file [file essd-2024-395-AC1-supplement.pdf]

Reply to the reviewer #1.

This paper employs a Lightweight Auto machine learning framework to produce a global terrestrial precipitable water vapor (PWV) dataset based on the MicroWave Radiation Imager (MWRI) aboard the FY-3 satellite series (FY-3B, FY-3C and FY-3D) spanning 2012 to 2020. The training dataset for the machine learning model is the enhanced GPS PWV dataset. SuomiNet GPS PWV, IGRA2 radiosonde, and the enhanced GPS PWV are used as reference datasets for validation. The authors examined the product quality from three perspectives: statistical fitting, spatial distribution, and temporal variation, while also assessing performance over different land surface types. It is recommended to be accepted after major revisions:

R: We sincerely appreciate your time and effort in reviewing our manuscript. Your valuable opinions and comments have been instrumental in improving the quality of our work. A point-by-point response is provided below, with the issues raised presented in black and our responses highlighted in blue.

1. The authors have not explained why the enhanced GPS PWV dataset was chosen as the training data for the machine learning model. This raises questions about the rationale of the research method.

R: Thank you for your thorough review. We choose the enhanced GPS PWV dataset as the training data for the following reasons: 1) The enhanced GPS PWV dataset provided an unprecedented number of GPS training samples (over 50 million) spanning diverse surface types from over 12,000 stations worldwide. 2) Compared to the operational GPS PWV product, the enhanced GPS PWV dataset demonstrates significant improvements in accuracy. Specifically, the mean absolute error (MAE) and standard deviation (SD) of the enhanced GPS PWV dataset, when compared against radiosonde-derived PWV, are reduced by an average of 19.5% and 6.2%, respectively. Furthermore, the number of unrealistic negative GPS PWV estimates is also significantly reduced by 92.4%, thanks to the accurate zenith hydrostatic delay (ZHD) derived from ERA5 (Yuan et al., 2023).

In summary, the enhanced GPS PWV dataset provides a more comprehensive, more representative and more accurate PWV product, which is essential for training machine learning models. Given the fact that the data volume and accuracy are critical requirements for machine learning, we decide to use this newly released GPS product as the learning label. As a matter of fact, this decision forms the foundation for developing an accurate and robust machine learning model, capable of reliably retrieving PWV under varying surface conditions.

2. Around line 245, the explanation for the bias between MWRI PWV and IGRA2 PWV is based on the argument that "the enhanced GPS PWV shares the same bias with IGRA2 PWV." This explanation lacks persuasive power and is not supported by relevant studies.

R: Thank you for your careful review. To clarify, our intention was to highlight that IGRA2 exhibited an underestimation of PWV at high PWV values when compared to MWRI PWV, and a similar trend was observed when comparing IGRA2 and enGPS PWV. The underlying reason for this phenomenon remains unclear and warrants further investigation. We apologize for this misunderstanding caused by our previous wording and have revised the manuscript accordingly to address this issue.

3. It is recommended to include an analysis of the machine learning model's uncertainty or error, particularly focusing on how the model performs under different weather conditions.

R: Thank you for your invaluable advice. We expanded our analysis by incorporating hourly ERA-5 total cloud cover and precipitation amount as the indicators of weather conditions. The matched ground-based PWV measurements (enGPS, SuomiNet, and IGRA-2) and MWRI PWV products are classified into six categories: those with precipitation and those without. The group without precipitation was further classified into four sub-classes based on CF (C1: CF ( $< 0.1$ ); C2: CF (0.1 – 0.3); C3: CF

(0.3 – 0.7); C4: CF (>0.7)) and the group with precipitation were classified into two sub-classes base on the amount of precipitation (C5: precipitation (0 – 5 mm) and C6: precipitation (>5 mm)). The RMSEs of MWRI PWV in the absence of precipitation range from 1.97 to 2.35 mm for different CF scenarios. While RMSE increases with higher CF, the overall uncertainty is still controlled within 2.35 mm. In cases of rainfall, the RMSE is 2.93 mm and 3.29 mm for the C5 and C6 scene, respectively. This result indicates that the MWRI PWV has a reliable performance under different weather conditions, although clouds and precipitation indeed reduce the accuracy of the MWRI PWV, but their overall effects are still tolerable.

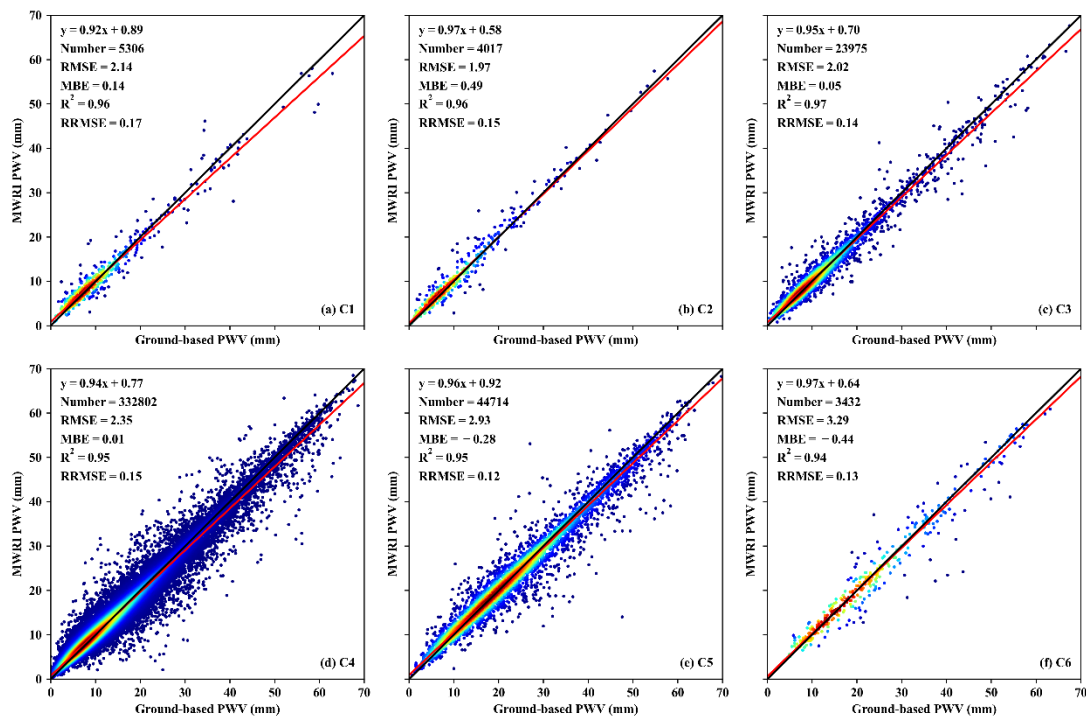

**Figure 6. Evaluation of MWRI PWV under different weather conditions against ground-based PWV ((a) C1: CF < 0.1, (b) C2: 0.1 < CF < 0.3, (c) C3: 0.3 < CF < 0.7, (d) C4: CF > 0.7, (e) C5: precipitation < 5mm and (f) C6: precipitation > 5mm).**

4. The dataset performs poorly under extreme weather conditions. It is recommended to consider increasing the variety of training data for machine learning in such regions. By categorizing rainfall events, the authors could select the dataset that performs best under specific rainfall conditions as the training data for the machine learning model.

R: Thank you for your advice. As you suggested before, we evaluated the performance of our ML model under different weather conditions, the performance under extreme weather conditions, for example, heavy rainfall, deteriorates when compared to that under clear skies. This is understandable because it is very hard to fully account for the effect of rain droplets on microwave radiation (via scattering and absorption) under this situation. In other words, MWRI brightness temperature is not only influenced by PWV but also by highly variable rain droplets under this condition. Our goal is to develop a ML model capable of retrieving PWV from MWRI under all conditions, using only MWRI brightness temperature as input. Developing an independent ML model specifically for extreme weather conditions is a valuable suggestion and is worth considering in the future when we have more training data points.

5. The MWRI has a limited number of channels and lacks high-frequency channels, which makes it less sensitive to precipitation compared to sensors with high-frequency channels. Could this limitation be mitigated

by incorporating data from other FY-3 sensors?

R: Thank you for your advice. We are aware that MWRI only includes the 10.65~89 GHz channels. Channels in the 118 GHz and 183 GHz are more sensitive to precipitation and PWV. Micro-Wave HumiditySonder-2 (MWHS-2) onboard FY3C, FY3D, FY-3E and FY-3F satellites provide measurements at 118 GHz and 183 GHz. MWRI is a conical scanning imager, while MWHS-2 is an across-track scanning radiometer, both scanning techniques offer unique advantages. Combing these two techniques could potentially benefit from higher spatial resolution, improved retrieval accuracy and better coverage. However, effective data fusion and model development would be necessary to combine these two types of measurements in a meaningful way. It is also important to note that the goal of this study is to establish the longest PWV dataset using only MWRI and we also consider that MWHS-1 onboard FY3B does not provide 183 GHz data, so combing MWHS and MWRI is not feasible within this study. Nevertheless, this suggestion is valuable and we will consider incorporating additional channels in future to enhance the performance of the algorithm.

6. In Figure 7, the number of validation stations seems not enough, and the spatial distribution is uneven, with most stations concentrated in Europe.

Is the validation in other regions reliable enough?

R: Thank you for your careful review. Indeed, most SuomiNet and IGRA-

2 stations are located in Europe and North America, and due to strict data collocation criteria (distance difference no more than 10 km, time difference no more than 15 min) between MWRI and ground-based data, many SuomiNet and IGRA-2 stations were excluded. To explore the uncertainty of MWRI PWV in other regions, we also validate MWRI PWV retrievals for six continents: Asia, Africa, North America, South America, Europe and Oceania. Figure 11 shows the comparison of MWRI PWV against PWV measurements from SuomiNet and IGRA-2 sites. MWRI PWV retrievals are reliable across all continents, although performance indeed varies between regions. The best results were observed in Africa and South America, despite the limited number of training data points from these areas, as a large proportion of the training points comes from stations in Europe and North America. This variation in performance is likely due to differences in weather and surface conditions across continents.

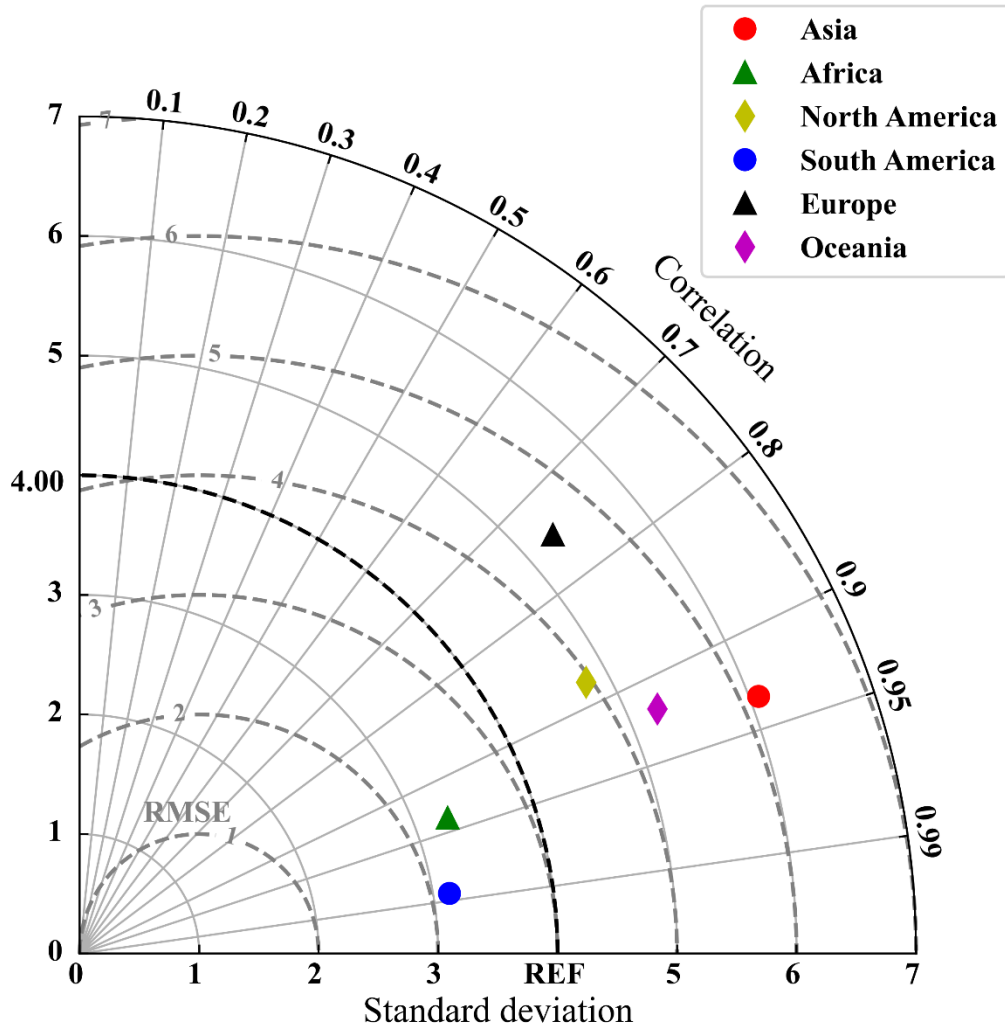

Figure 11. Taylor diagram of MWRI PWV against PWV driven by SuomiNet and IGRA-2 sites over 6 continents (Asia, Africa, North America, South America, Europe and Oceania).

7. It is recommended to include a quality comparison between the FY-3 MWRI Level 1C Tb dataset and other Tb datasets to highlight the innovation of the study.

R: Thank you for your advice. Regarding the comparison of the FY-3 MWRI Level 1C Tb with other similar instruments in our previous work, we have conducted a comprehensive evaluation of the FY-3 MWRI channels over land and ocean, over ascending and descending orbits, using



the GPM GMI as a reference, and the results show that the bias of the MWRI in ascending and descending orbits after recalibration is well-controlled, with the overall MBE being less than 0.5 K and the RMSE being less than 1.5 K, respectively (Xia et al., 2023). We also highlighted this in Line 122 with: “Consequently, the precision of MWRI Tb datasets, particularly in the water vapor absorption channel, has been markedly enhanced. Cross-comparisons with datasets from other satellites, such as AMSR2 and GMI, have validated the effectiveness of the recalibrated MWRI Tb datasets (He et al., 2023; Xia et al., 2023b)” and Line 141 with: “Following the extensive reprocessing of FY-3 historical data, a new version of the long-term recalibrated FY-3 MWRI L1C Tb dataset has been released by NSMC (Wu et al., 2023). MWRI Tbs from 3 FY-3 satellites (FY-3B, FY-3C and FY-3D) were evaluated by using GMI as a reference, demonstrating that the newly recalibrated dataset exhibited a notable enhancement in accuracy, with the RMSE for each channel remaining below 2 K (Xia et al., 2023b)”.

Xia, X., He, W., Wu, S., Fu, D., Shao, W., Zhang, P., and Xia, Xiangao: A Thorough Evaluation of the Passive Microwave Radiometer Measurements onboard Three Fengyun-3 Satellites, *J. Meteorol. Res.* 37, 573–588, <https://doi.org/10.1007/s13351-023-2198-3>, 2023.

8. Many of the references cited are outdated. It is recommended to

incorporate more recent studies in the literature review.

R: Thank you for your advice. We have added references to the more recent research advances in this direction that are currently available, as follows:

Zhao, Q., Ma, Z., Yin, J., Yao, Y., Yao, W., Du, Z., Wang, W.: General method of precipitable water vapor retrieval from remote sensing satellite near-infrared data. *Remote Sensing of Environment* 308, 114180. <https://doi.org/10.1016/j.rse.2024.114180>, 2024.

Zhou, S., Cheng, J.: A physics-based atmospheric precipitable water vapor retrieval algorithm by synchronizing MODIS near-infrared and thermal infrared measurements. *Remote Sens. Environ.* 317, 114523. <https://doi.org/10.1016/j.rse.2024.114523>, 2025.

Ma, X., Yao, Y., Zhang, B., He, C.: Retrieval of high spatial resolution precipitable water vapor maps using heterogeneous earth observation data. *Remote Sensing of Environment* 278, 113100. <https://doi.org/10.1016/j.rse.2022.113100>, 2022.

Jiang, N., Xu, Y., Xu, T., Li, S., Gao, Z.: Land Water Vapor Retrieval for AMSR2 Using a Deep Learning Method. *IEEE Trans. Geosci. Remote Sensing* 60, 1–11. <https://doi.org/10.1109/TGRS.2022.3162222>, 2022.

Jiang, N., Wu, Y., Li, S., Xu, Y., Wang, Y., Xu, T.: First PWV Retrieval Using MERSI - LL Onboard FY - 3E and Cross Validation With Co - Platform Occultation and Ground GNSS. *Geophysical Research Letters* 51, e2024GL108681. <https://doi.org/10.1029/2024GL108681>, 2024.

He, W., Chen, H., Xia, X., Wu, S., Zhang, P.: Evaluation of the Long-term Performance of Microwave Radiation Imager Onboard Chinese Fengyun Satellites. *Adv. Atmos. Sci.* 40, 1257–1268. <https://doi.org/10.1007/s00376-023-2199-2>, 2023.

Li, R., Hu, J., Wu, S., Zhang, P., Letu, H., Wang, Y., Wang, X., Fu, Y., Zhou, R., Sun, L.: Spatiotemporal Variations of Microwave Land Surface Emissivity (MLSE) over China Derived from Four-Year Recalibrated Fengyun 3B MWRI Data. *Adv. Atmospheric Sci.* 39, 1536–1560. <https://doi.org/10.1007/s00376-022-1314-0>, 2022.

Wang, Y., Jiang, N., Wu, Y., Xu, Y., Kaufmann, H., Xu, T.: An Improved Model for the Retrieval of Precipitable Water Vapor in All-Weather Conditions (RCMNT) Based on NIR and TIR Recordings of MODIS. *IEEE Trans. Geosci. Remote Sens.* 62, 1–12. <https://doi.org/10.1109/TGRS.2024.3381750>, 2024.

Su, H., Yang, T., Wang, K., Sun, B., Yang, X.: Evaluation of Precipitable Water Vapor Retrieval from Homogeneously Reprocessed Long-Term GNSS Tropospheric Zenith Wet Delay, and Multi-Technique. *Remote Sensing* 13, 4490. <https://doi.org/10.3390/rs13214490>, 2021.

He, J., Liu, Z.: Water Vapor Retrieval from MODIS NIR Channels Using Ground-Based GPS Data. *IEEE Trans. Geosci. Remote Sensing* 58 (5), 3726–37. <https://doi.org/10.1109/TGRS.2019.2962057>, 2020.

He, J., Liu, Z.: Refining MODIS NIR Atmospheric Water Vapor Retrieval

Algorithm Using GPS-Derived Water Vapor Data. *IEEE Trans. Geosci.*

*Remote Sensing* 59, 3682–3694.

<https://doi.org/10.1109/TGRS.2020.3016655>, 2021.
